# Supplementary material
Source: PubMed Central journal article supplement (PMC4941924)

**Supplementary Table S1:** Data collection and refinement statistics for CpOGA<sup>D298N</sup> - O-GlcNAcylated dHCF peptide complex

|                                                     | CpOGA <sup>D298N</sup> - dHCF O-GlcNAc peptide<br>(Ac-VPS(O-GlcNAc)TMSAN-NH <sub>2</sub> ) |
|-----------------------------------------------------|--------------------------------------------------------------------------------------------|
| <b>Data collection</b>                              |                                                                                            |
| Beamline, wavelength                                | ID23-1 (ESRF), 0.8729                                                                      |
| Space group                                         | P6 <sub>1</sub>                                                                            |
| Cell dimensions (Å)                                 | <i>a</i> = <i>b</i> =118.6, <i>c</i> =148.4                                                |
| Resolution (Å)                                      | 34.90 - 2.60 (2.72 - 2.60)                                                                 |
| <i>R</i> <sub>merge</sub> (within I+/-)             | 0.134 (0.733)                                                                              |
| I/σ                                                 | 7.3 (1.5)                                                                                  |
| Completeness (%)                                    | 99.4 (99.0)                                                                                |
| Redundancy                                          | 3.3 (3.8 - 3.3)                                                                            |
| CC-half                                             | 0.983 (0.980 – 0.601)                                                                      |
| <b>Refinement</b>                                   |                                                                                            |
| Unique reflections                                  | 36087                                                                                      |
| <i>R</i> <sub>work</sub> , <i>R</i> <sub>free</sub> | 0.1705/ 0.2201                                                                             |
| No. atoms:                                          |                                                                                            |
| Protein                                             | 4576                                                                                       |
| Cadmium                                             | 15                                                                                         |
| Glycopeptide                                        | 39                                                                                         |
| Water                                               | 82                                                                                         |
| <i>B</i> -factors:                                  |                                                                                            |
| Protein                                             | 291.36                                                                                     |
| Glycopeptide                                        | 341.61                                                                                     |
| R.m.s. deviations:                                  |                                                                                            |
| Bond lengths (Å)                                    | 0.0061                                                                                     |
| Bond angles (°)                                     | 1.0067                                                                                     |
| Ramachandran plot:                                  |                                                                                            |
| in preferred regions (%)                            | 96.72                                                                                      |
| in allowed regions (%)                              | 2.76                                                                                       |
| outliers (%)                                        | 0.52                                                                                       |
| PDB ID                                              | 4ZXL                                                                                       |

**Figure S1 (Related to Figure 1):** HCF-1 O-GlcNAc site mapping. O-GlcNAcylated peptide was site mapped through mass spectrometry and ETD MS/MS fragmentation to identify the O-GlcNAc site. ETD-MS/MS spectrum of HCF-1 [<sup>614</sup>VPSTMSANVVLSSSSSTLR<sup>632</sup> + GlcNAc]<sup>+</sup> = 2142.13 *m/z*, produced an intense ion at *m/z* 715.47 corresponding to the tricharged precursor. The spectrum shows the *c*<sup>+1</sup> ions (orange), the *z*<sup>+1</sup> ions (green) and the *y*<sup>+1</sup> ions (blue). The O-GlcNAcylation at T617 is identified by the detection of its *c*<sup>+1</sup> ion at *m/z* 605.86, *z*<sup>+1</sup> at *m/z* 1539.77 and *y*<sup>+1</sup> at *m/z* 1858.91.

**Figure S2 (Related to Figure 1):** Surface Plasmon Resonance binding assay

**a)** Sensorgram for binding of O-GlcNAcylated hOGA peptide to CpOGA<sup>D298N</sup>. The peptide was injected in duplicates at various concentrations (2-500 μM and 0.04-10 μM respectively). RU: relative units.

**b)** Sensorgram for binding of O-GlcNAcylated TAB1 peptide to CpOGA<sup>D298N</sup>. The peptide was injected in duplicates at various concentrations (2-500 μM and 0.08-20 μM respectively). RU: relative units.

**Figure S3 (Related to Figures 2 and 3):**

**a)** Far Westerns with GST-CpOGA<sup>WT</sup>, GST-CpOGA<sup>D401A</sup> and GST-CpOGA<sup>D298N, D401A</sup> were performed on either unmodified or *in vitro* O-GlcNAcylated TAB1 (labels adjacent to the blots). Pre-treatment as indicated above the blots were performed to demonstrate the activity of all the CpOGA constructs.

**b)** HEK293 lysates deglycosylated with CpOGA<sup>WT</sup> or without were subjected to GST Far Western or immunoblot with anti-GST antibody or IR-labelled anti-sheep secondary antibody.

**c)** HEK293 lysates without or with CpOGA<sup>WT</sup> pre-treatment were subjected to Concanavalin A (ConA) Eastern blot.

**d)** Identical duplicate HEK293 lysates were subjected to Far Westerns with GST-CpOGA<sup>D298N</sup>, GST-CpOGA<sup>WT</sup>, GST-CpOGA<sup>D401A</sup> and GST-CpOGA<sup>D298N, D401A</sup>.

**e)** 0-16 h *Drosophila* embryonic lysates without or with PNGase F pre-treatment were subjected to ConA Eastern blot.

**Figure S4:**

**a)** 0-16 h *Drosophila* embryonic lysates without or with PNGase F/CpOGA<sup>WT</sup> pre-treatment were subjected to GST-CpOGA<sup>D298N</sup> Far Western (first left panel), immunoblotted with anti-O-GlcNAc antibody, RL2 (second panel from left) or anti-O-GlcNAc antibody, CTD110.6 (third panel from left).

The right panel is a high contrast rendering of the CTD110.6 immunoblot to demonstrate lack of specific signal. The lysates were separated on a 6% SDS PAGE gel.

**b)** 0-16 h *Drosophila* embryonic lysates without or with PNGase F/CpOGA<sup>WT</sup> pre-treatment were subjected to in the presence (+) or absence (-) of GalTI. The lysates were then separated on a 6% SDS PAGE gel and blotted with Streptavidin conjugated to infrared 680 dye.

Figure S1

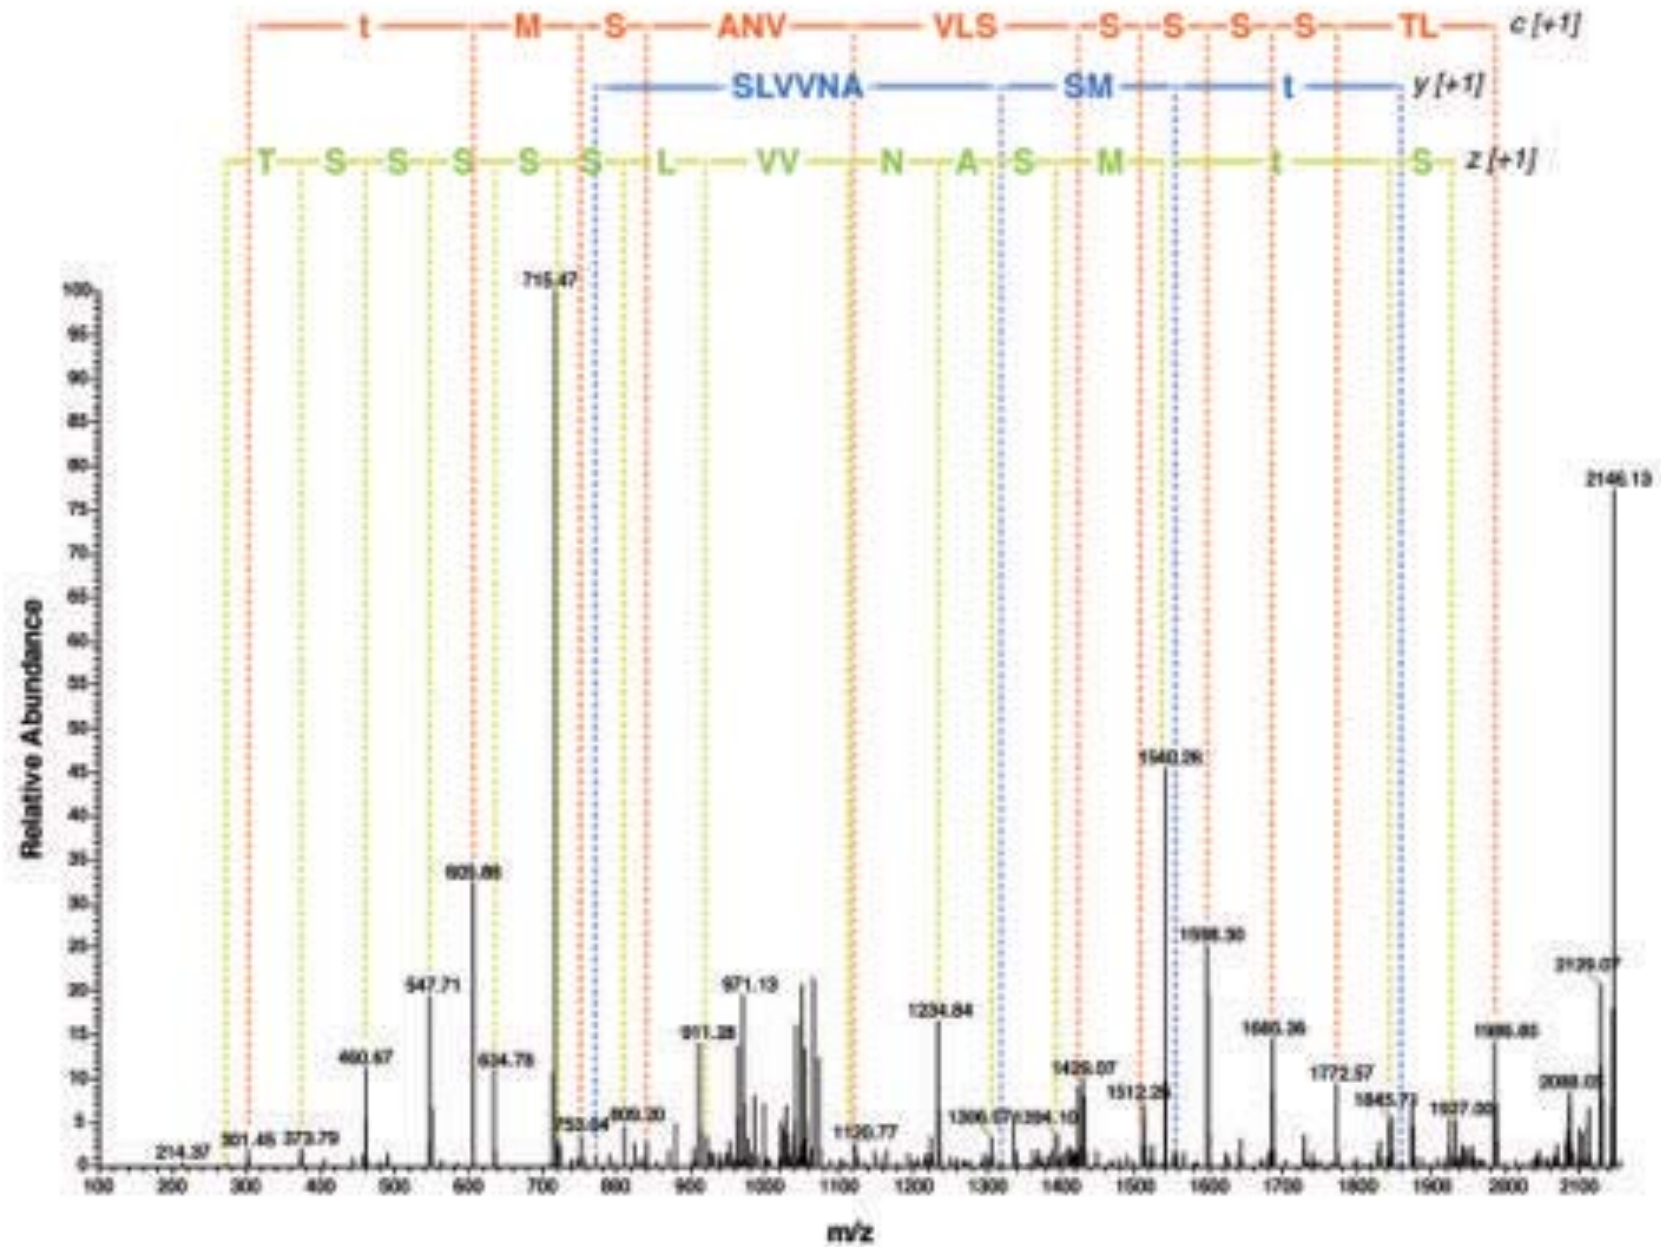

Figure S2

a

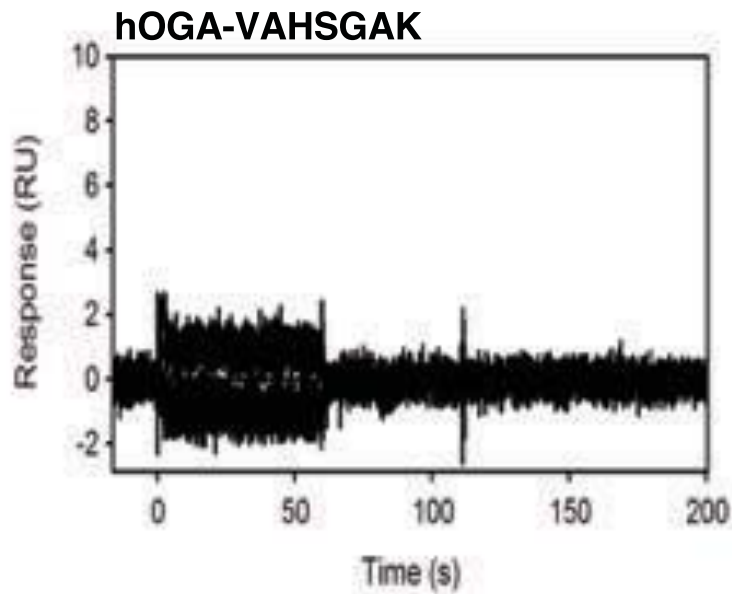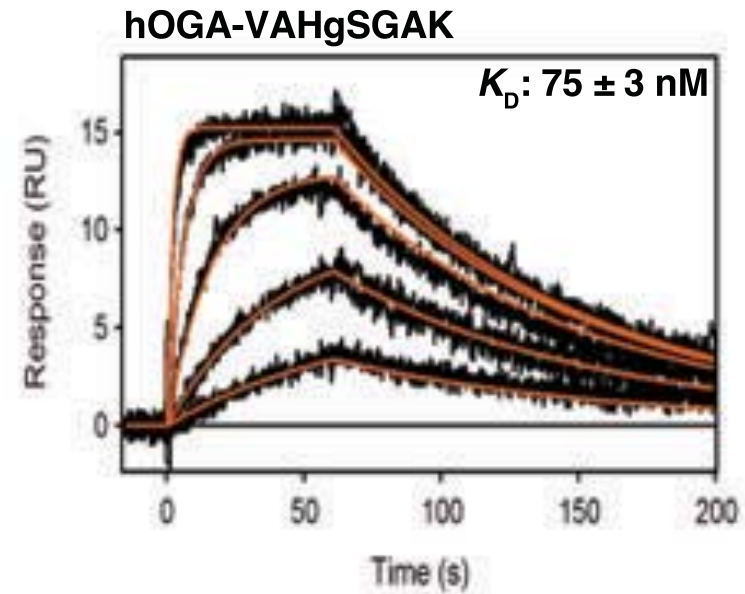

b

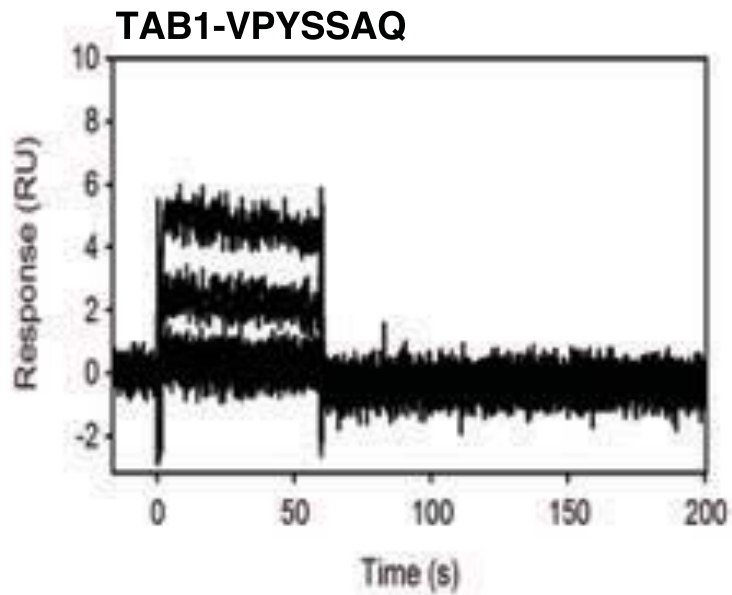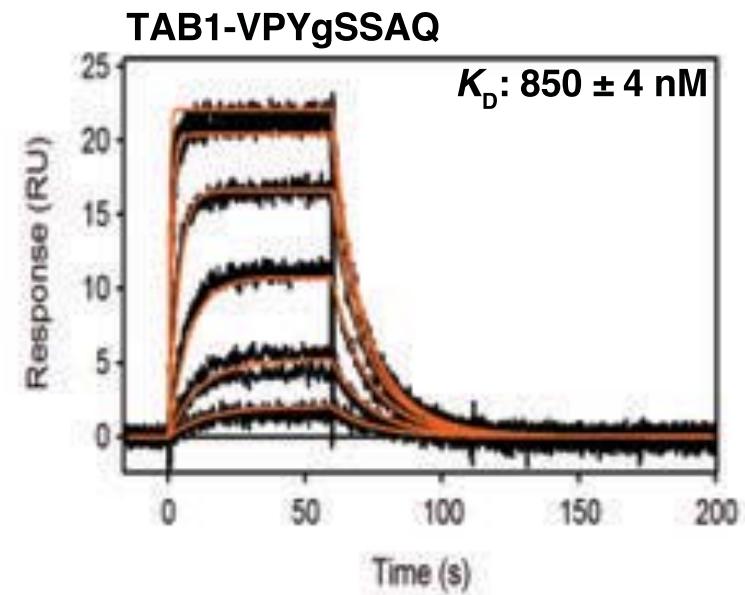

**Figure S3**

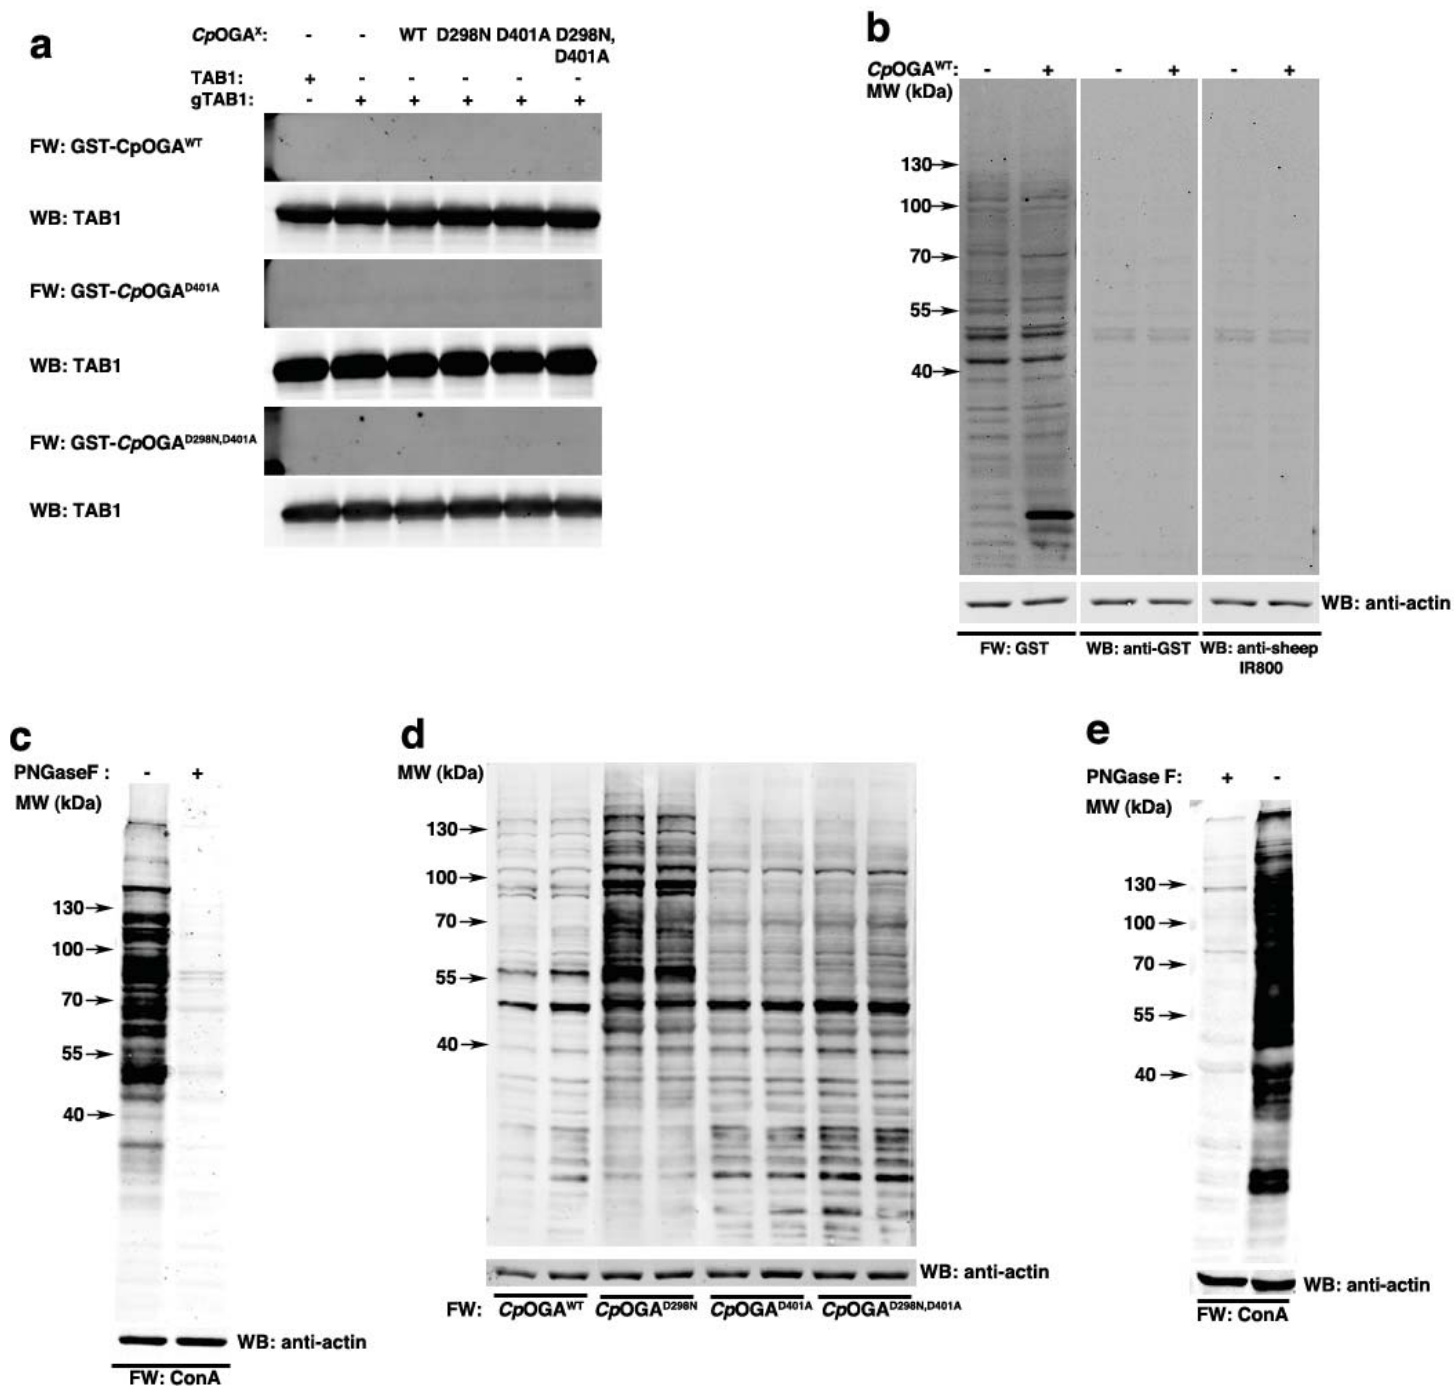

**Figure S4**

**a**

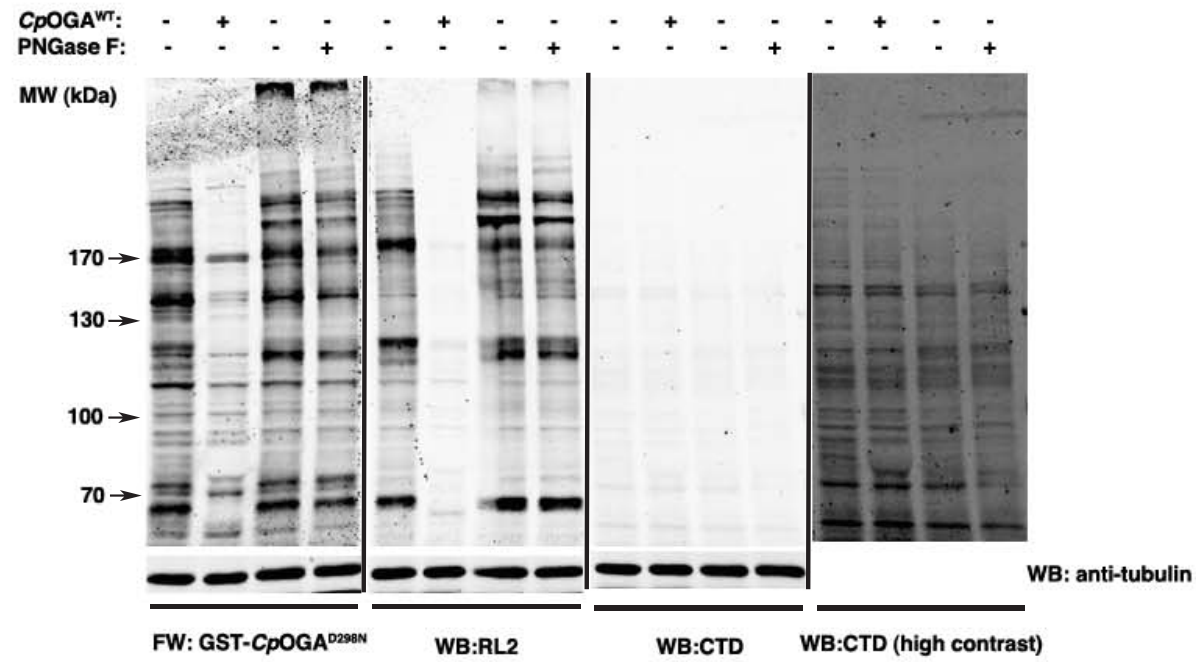

**b**

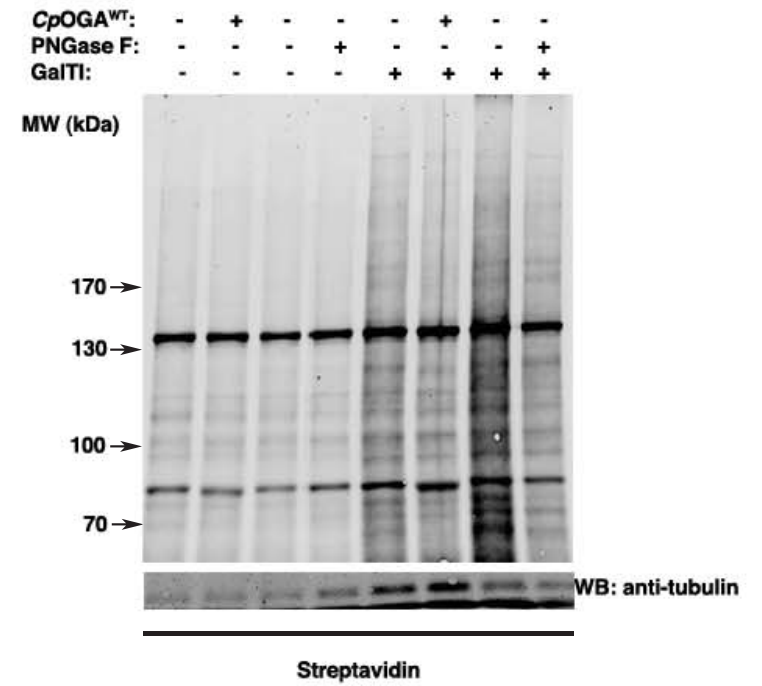

Supplement: NIHMS66540-supplement-Supplementary_Table_and_Figures.pdf [file NIHMS66540-supplement-Supplementary_Table_and_Figures.pdf]
